# Supplementary material for: Development of a noninvasive photograph-based method for the evaluation of body condition in free-ranging brown bears
Source: PeerJ. 2020 Sep 18;8:e9982. doi: 10.7717/peerj.9982 (PMC7505064; doi:10.7717/peerj.9982)
Supplement: Data S1 [file peerj-08-9982-s006.xlsx]

## Sheet: Sheet1
Bear ID	Sex	Year	Month	Age	Body weight	Body length	Torso height
LI	F	2016	7	20	118	151	45
BE	F	2015	7	range.AD	120	152	46
WK	F	2016	7	14	115	145	45
WM	F	2017	10	range.AD	117	138.5	n.a.
DR	F	2016	8	12	127.5	149	42
KR	F	2014	8	13	144	155	46
RI	F	2016	8	14	145.5	163	46
KS	F	2015	7	range.AD	140	148	48
WD	F	2017	10	range.AD	149	150	49
GB	F	2015	9	6	100	140	39
GI	F	2015	9	5	105	151	44
MS	M	2014	9	15	306	195	n.a.
KT	M	2014	7	9	163	162	n.a.
EZ	M	2015	9	30	345	176.5	n.a.
OR	M	2013	8	34	191.5	166	n.a.
TR	M	2010	7	3	89	131	n.a.
DQ	M	2010	7	4	118	147.5	n.a.
MO	M	2010	8	2	75	125	n.a.
SZ	F	2015	10	7	99	140.5	41
CC	M	2011	10	2	130	140.5	n.a.
KG	M	2011	10	2	119	145	n.a.
YU	M	2011	10	3	113	131	n.a.
BM	M	2011	11	3	188	157	n.a.
MY	M	2014	4	4	112	153.5	n.a.
RU	M	2013	6	3	139	156	n.a.
LE	M	2013	4	3	120	148	n.a.
SK	M	2012	7	2	57	115	n.a.
SC	F	2015	9	5	114	147.5	n.a.
BK	F	2015	8	4	87.4	138	n.a.
FK	M	2015	6	4	127	143	n.a.
TP	F	2014	7	1	31.5	100	n.a.
LL	M	2014	6	1	39	114	n.a.
WI	M	2017	10	3	121	148	n.a.
KZ	M	2015	7	3	93	130	n.a.
17B02	M	2017	6	1	37	95	n.a.
17B03	M	2017	6	3	41.5	114	n.a.
17B04	M	2017	7	3	94	145	n.a.
17B05	F	2017	7	3	73	125	n.a.
17B07	M	2017	7	3	83	135	n.a.
17B08	M	2017	7	10	181	161.5	n.a.
17B09	M	2017	8	1	39	115	n.a.
17B10	M	2017	8	1	50	100.9	n.a.
17B11	M	2017	9	1	36	94	n.a.
17B15	F	2017	9	1	43	94.5	n.a.
17B19	F	2017	10	range.AD	110.5	144	37.5
17B20	F	2017	10	0	15	78.5	n.a.
17B21	F	2017	10	9	111	139	41.5
17B22	M	2017	10	2	68	131	n.a.
17B25	F	2017	10	10	157	147.5	56
17B26	F	2017	10	14	113	140	n.a.
17B29	F	2017	11	2	72.5	127	n.a.
17B30	F	2017	11	7	134	151	41
17B31	F	2017	11	3	74	124	n.a.
17B32	F	2017	11	range.AD	106	143	45
17B33	M	2017	11	2	70.5	119	n.a.
16B01	M	2016	5	3	86.5	131	n.a.
16B02	F	2016	5	1	10.35	66	n.a.
16B04	M	2016	6	2	90	129	n.a.
16B08	F	2016	7	4	78	125	n.a.
16B11	M	2016	8	2	105	145	n.a.
16B12	M	2016	9	2	85	133.5	n.a.
16B14	F	2016	9	0	15.3	71.5	n.a.
16B15	F	2016	9	0	18.8	80.2	n.a.
16B16	F	2016	9	0	16.6	77	n.a.
16B17	M	2016	9	2	103	139	n.a.
16B18	F	2016	9	15	166	152	52
16B19	F	2016	11	16	143	145	48
16B20	M	2016	11	0	43	102	n.a.
16B21	M	2016	11	2	65	105	n.a.
16B22	F	2016	11	1	71	119.5	n.a.
16B23	F	2016	11	1	72	118.5	n.a.
16B25	F	2016	11	2	84	119	n.a.
15B05	M	2015	6	3	86	125	n.a.
15B09	F	2015	6	6	123	136.3	n.a.
15B10	F	2015	6	range.AD	95	143	n.a.
15B11	M	2015	6	1	40	99.5	n.a.
15B12	F	2015	6	1	31	95	n.a.
15B15	M	2015	6	1	25	82	n.a.
15B16	F	2015	7	4	79	131	n.a.
15B19	M	2015	7	2	68	114	n.a.
15B20	F	2015	7	1	26.5	89	n.a.
15B21	M	2015	7	2	50	108	n.a.
15B22	F	2015	7	0	8.5	57	n.a.
15B23	M	2015	7	0	7	51	n.a.
15B24	M	2015	7	1	31	88	n.a.
15B25	M	2015	8	1	59	120	n.a.
15B26	M	2015	8	4	152	158	n.a.
15B27	F	2015	8	1	37	89	n.a.
15B28	F	2015	8	range.AD	92	131	n.a.
15B29	M	2015	8	1	45	100	n.a.
15B31	M	2015	8	1	54	107	n.a.
15B32	F	2015	8	range.AD	117	136	n.a.
15B33	F	2015	8	range.AD	90	132.5	n.a.
15B36	M	2015	8	2	81	129	n.a.
15B38	M	2015	9	0	13.5	75.5	n.a.
15B39	M	2015	9	0	11.5	66	n.a.
15B40	F	2015	9	4	68	126.5	n.a.
15B41	F	2015	9	5	84	139	n.a.
15B43	M	2015	9	0	7.3	63	n.a.
15B44	M	2015	9	0	8	66.3	n.a.
15B46	F	2015	9	3	80.5	130	n.a.
15B50	F	2015	10	4	117	140.5	n.a.
15B52	F	2015	11	5	90	133	41
15B55	F	2015	10	range.AD	130	146	43
15B56	F	2015	10	range.AD	136	149.5	n.a.
15B57	F	2015	11	range.AD	98	142	39.5
15B58	M	2015	11	1	56	124.5	n.a.
15B59	F	2015	11	1	42	107.5	n.a.
15B60	F	2015	11	range.AD	189	143	55
15B61	F	2015	11	range.AD	142	145	n.a.
CM	F	2004	9	9	89	139.2	n.a.
MI	F	2016	9	18	136	151	45
14B01	M	2014	5	2	65	121	n.a.
14B02	M	2014	5	3	92	137.5	n.a.
14B04	F	2014	6	range.AD	88	142	n.a.
14B05	M	2014	6	2	76	132	n.a.
14B06	M	2014	6	range.AD	220	177	n.a.
14B11	M	2014	7	range.SA	164	168	n.a.
14B12	M	2014	7	18	212	178	n.a.
14B13	F	2014	7	4	100	143.5	n.a.
14B17	M	2014	7	5	118	146.5	n.a.
14B18	F	2014	8	range.AD	85	132	n.a.
14B25	F	2014	10	1	45.5	111	n.a.
14B26	M	2014	10	1	65	113	n.a.
13B05	M	2013	7	2	84	133	n.a.
13B06	M	2013	8	1	37	107	n.a.
13B07	F	2013	8	4	101	145.5	n.a.
13B08	M	2013	8	17	231	175	n.a.
13B10	M	2013	8	7	266	192	n.a.
13B12	M	2013	8	2	50	109	n.a.
13B13	F	2013	9	5	95	131	n.a.
13B14	F	2013	10	1	36	106	n.a.
13B15	F	2013	11	1	60	113	n.a.
12B01	F	2012	6	1	24	92.5	n.a.
12B02	M	2012	6	1	15	76.4	n.a.
12B03	M	2012	6	2	45	108.5	n.a.
12B05	F	2012	7	1	25	96	n.a.
12B09	M	2012	8	2	69	132	n.a.
12B11	M	2012	8	4	118	144	n.a.
12B12	M	2012	8	3	100	132	n.a.
12B13	M	2012	8	0	8	58	n.a.
12B14	F	2012	8	14	138	145	n.a.
12B16	F	2012	8	range.AD	96	136	n.a.
12B18	F	2012	8	2	72	125	n.a.
12B19	F	2012	9	1	15	79	n.a.
12B20	F	2012	9	range.AD	66	138	n.a.
11B01	M	2011	4	3	99	141.6	n.a.
11B02	F	2013	7	7	99	143	n.a.
11B04	M	2011	6	3	110	146	n.a.
11B05	F	2011	6	21	105	139.5	n.a.
11B06	F	2011	6	2	44.5	110.5	n.a.
11B07	F	2011	6	2	53	113.5	n.a.
11B08	F	2012	8	range.AD	101	143	n.a.
11B09	M	2012	7	range.AD	208	162.5	n.a.
11B10	M	2011	6	2	54	118	n.a.
11B11	M	2011	7	4	149	157	n.a.
11B12	F	2011	7	1	39	64	n.a.
11B13	M	2011	7	5	168	155	n.a.
11B14	F	2011	7	3	71	130	n.a.
11B15	F	2011	7	7	105	144	n.a.
11B16	M	2011	8	1	37	98	n.a.
11B17	F	2011	8	9	112	142.5	n.a.
11B18	M	2011	8	1	51	115	n.a.
11B19	F	2011	9	range.AD	125	150	n.a.
11B20	M	2011	9	0	31	91	n.a.
11B21	M	2011	9	0	10	66	n.a.
11B23	F	2011	9	5	132	138	n.a.
11B24	M	2011	10	0	16	78.6	n.a.
11B25	M	2011	10	0	15	71	n.a.
11B26	F	2011	10	2	35.5	95	n.a.
11B27	M	2011	10	range.AD	354	190	n.a.
11B28	M	2011	10	3	90	134	n.a.
11B29	M	2011	10	2	70	115	n.a.
11B30	M	2011	10	7	147	156.5	n.a.
11B31	M	2011	11	1	100	131	n.a.
10B01	F	2010	5	16	113	157	n.a.
10B02	M	2010	6	2	74	120	n.a.
10B03	M	2010	7	1	50	115	n.a.
10B05	M	2010	7	7	221	173	n.a.
10B06	M	2010	7	2	80	131	n.a.
10B08	M	2010	8	1	45	107	n.a.
10B10	M	2010	9	1	37	100.8	n.a.
10B12	M	2010	10	3	125	148	n.a.
10B13	F	2010	10	range.AD	139	144	n.a.
10B14	F	2010	10	1	64	111	n.a.
09B02	M	2009	5	4	120	142.5	n.a.
09B03	M	2009	6	1	40	106.2	n.a.
09B04	M	2009	6	1	37	105	n.a.
09B07	M	2009	6	2	85	136	n.a.
09B08	F	2009	6	1	33	104	n.a.
09B11	M	2009	8	1	60	117.5	n.a.
09B12	F	2009	8	range.AD	123	145	n.a.
09B13	M	2009	8	1	47	104	n.a.
09B14	M	2009	8	2	56	119	n.a.
09B15	F	2009	9	11	153	160.5	n.a.
09B17	M	2009	10	range.AD	374	205	n.a.
08B01	M	2008	5	7	193	160	n.a.
08B05	M	2009	8	2	71	130	n.a.
08B06	M	2008	6	1	49	114.3	n.a.
08B07	F	2008	7	3	88	127	n.a.
08B09	M	2008	7	1	41	104.3	n.a.
08B10	F	2008	7	1	28	87.5	n.a.
08B12	F	2008	7	2	76	130.5	n.a.
08B14	F	2008	9	4	106	139.8	n.a.
08B15	M	2008	10	range.AD	306	188.5	n.a.
08B16	F	2008	10	range.AD	100	133	n.a.
08B20	M	2008	11	4	213	167	n.a.
08B21	F	2008	11	4	100	130	n.a.
07B01	F	2007	5	17	52	130.5	n.a.
07B02	M	2007	5	6	115.5	158	n.a.
07B03	F	2007	6	7	93	141	n.a.
07B04	M	2007	6	1	47	113	n.a.
07B05	F	2007	6	3	86	137.5	n.a.
07B06	M	2007	6	2	72	125	n.a.
07B07	M	2007	6	5	137	171	n.a.
07B09	M	2007	6	2	60	118	n.a.
07B10	M	2007	7	1	37	97	n.a.
07B11	F	2008	11	3	170	152.5	n.a.
07B12	M	2007	7	4	147	161	n.a.
07B13	F	2007	7	1	41	105.5	n.a.
07B14	F	2007	7	1	39	108	n.a.
07B15	M	2007	7	1	29	102	n.a.
07B16	M	2007	7	1	36	101.5	n.a.
07B17	F	2007	7	13	90	143.5	n.a.
07B18	M	2007	8	4	182	166	n.a.
07B19	M	2007	9	3	134	160	n.a.
06B01	F	2006	5	3	117	136	n.a.
06B02	F	2006	5	4	73	125	n.a.
06B03	M	2006	6	2	85	133	n.a.
06B05	M	2006	6	1	17	87	n.a.
06B08	F	2006	6	4	98	137	n.a.
06B09	F	2006	6	4	103	140.5	n.a.
06B10	F	2006	7	range.AD	101.5	151	n.a.
06B11	M	2006	7	1	38	111	n.a.
06B12	M	2006	7	3	93	144	n.a.
06B13	M	2006	7	7	227	181	n.a.
06B14	F	2006	7	range.AD	89	140	n.a.
06B15	M	2006	7	1	60	112.5	n.a.
06B17	F	2006	10	6	99	146	n.a.
06B20	M	2006	11	1	83	118.2	n.a.
06B21	F	2006	11	range.AD	133	148.9	n.a.
05B01	M	2005	5	2	102	105.5	n.a.
05B07	M	2005	7	4	235	182	n.a.
05B08	M	2005	7	3	129.5	158.1	n.a.
05B09	F	2005	7	3	110	146.5	n.a.
05B10	M	2005	7	2	111	142.5	n.a.
05B11	M	2005	7	2	93	137	n.a.
05B12	M	2005	9	1	70	127	n.a.
05B13	M	2005	10	2	117	149	n.a.
05B14	M	2005	10	1	57	110	n.a.
05B16	M	2005	11	1	100	115	n.a.
05B18	M	2005	11	0	34	81	n.a.
04B01	M	2004	4	3	118	142.9	n.a.
04B02	M	2004	5	2	77	128	n.a.
04B05	M	2004	6	1	40	103	n.a.
04B06	M	2004	6	1	30	97	n.a.
04B07	M	2004	6	1	32	98.5	n.a.
04B10	M	2004	7	1	39	102.3	n.a.
04B13	F	2004	10	19	109	150	n.a.
03B01	M	2003	4	2	71	131	n.a.
03B02	M	2003	5	12	273.5	173.5	n.a.
03B06	M	2003	8	9	254	187	n.a.
03B07	M	2003	8	2	75	123.8	n.a.
03B09	F	2003	10	range.AD	120	150.4	n.a.
03B11	M	2003	11	2	123.5	148.3	n.a.
03B12	M	2003	11	2	131	148	n.a.
02B01	F	2002	6	2	78	128.5	n.a.
02B02	M	2002	7	range.SA	150	162	n.a.
02B04	F	2002	8	2	73	132.5	n.a.
02B05	F	2002	9	1	36	106.6	n.a.
02B06	F	2002	10	range.AD	125	152.2	n.a.
02B07	F	2002	10	1	51	117.4	n.a.
02B08	M	2002	11	12	400	198	n.a.
02B11	M	2002	11	0	57	110.5	n.a.
01B01	M	2001	4	2	66	119	n.a.
01B02	F	2001	5	3	95	136	n.a.
01B03	F	2001	5	3	99	151.5	n.a.
01B04	F	2004	9	8	107	150	n.a.
00B01	M	2000	7	1	56.8	114.5	n.a.
00B04	F	2000	10	4	114	152.5	n.a.
00B05	F	2000	11	2	71	130	n.a.
99B01	F	1999	5	3	83	128	n.a.
99B02	M	1999	6	2	80	133.5	n.a.
99B03	M	1999	6	0	6	56.4	n.a.
99B07	F	1999	8	2	36	108	n.a.
99B08	M	1999	8	2	98	135.5	n.a.
98B09	M	1998	10	2	95	129	n.a.
R17B01	M	2017	5	4	89	140	n.a.
R17B02	F	2017	5	5	101.8	136.4	n.a.
R17B04	M	2017	6	3	120	144	n.a.
R17B05	M	2017	7	3	111	137.5	n.a.
R17B06	M	2017	8	1	24	93	n.a.
R17B08	M	2017	10	range.AD	260	178	n.a.
R17B10	F	2017	10	3	96	128	n.a.
R17B13	M	2017	11	12	300	188	n.a.
6331	M	2016	7	7	206	178	n.a.
6335	M	2016	11	range.AD	321	207	n.a.
5335	M	2015	4	4	111.3	158	n.a.
5337	M	2015	7	2	63	112	n.a.
5338	F	2015	7	1	32	102	n.a.
5339	M	2015	8	2	79	122	n.a.
5340	M	2015	8	4	120	151	n.a.
5342	M	2015	8	range.AD	259	182	n.a.
5343	M	2015	8	0	19	87.4	n.a.
5345	M	2015	8	0	11	69.5	n.a.
5346	M	2015	8	2	89.5	138	n.a.
5347	M	2015	8	1	39	101	n.a.
5348	M	2015	8	1	42.5	103	n.a.
5349	F	2015	8	1	19.4	87	n.a.
5350	M	2015	9	range.AD	224	168	n.a.
5352	M	2015	10	range.SA	232	170.5	n.a.
5330	M	2014	5	5	120	137.5	n.a.
5331	M	2014	6	1	58	111	n.a.
5281	F	2012	5	12	74	141	n.a.
5282	F	2012	5	4	91	151	n.a.
5353	M	2012	6	1	89	138	n.a.
5293	M	2012	7	3	78	136	n.a.
5294	M	2012	7	2	39	102	n.a.
5295	M	2012	7	2	46	114	n.a.
5297	M	2012	7	3	102	126	n.a.
5299	F	2012	7	2	66	125	n.a.
5298	M	2012	7	16	250	179	n.a.
5300	M	2012	7	14	206	171	n.a.
5301	F	2012	7	1	44	104	n.a.
5302	F	2012	8	9	93	128	n.a.
5305	M	2012	8	1	32	95	n.a.
5304	F	2012	8	1	26	83	n.a.
5303	M	2012	8	1	20	85	n.a.
5306	F	2012	8	10	79	133	n.a.
5309	M	2012	8	4	107	141	n.a.
5308	F	2012	8	2	22	99.5	n.a.
5307	F	2012	8	2	32	102	n.a.
5310	M	2012	8	3	46	115	n.a.
5311	F	2012	8	7	73	129	n.a.
5312	M	2012	8	17	159	168	n.a.
5313	F	2012	8	0	9	66	n.a.
5314	F	2012	8	13	97	141	n.a.
5315	M	2012	8	12	186	165	n.a.
5316	F	2012	8	12	69	137	n.a.
5317	F	2012	8	3	54	119	n.a.
5318	M	2012	8	2	44	106	n.a.
5319	F	2012	8	6	69	130	n.a.
5320	M	2012	8	8	161.4	164.5	n.a.
5321	M	2012	9	2	45	115	n.a.
5322	F	2012	9	2	35	107	n.a.
5323	F	2012	9	2	40.4	113	n.a.
5324	F	2012	9	14	110	147	n.a.
5325	F	2012	9	7	83	127	n.a.
5354	F	2012	9	0	14.6	77	n.a.
5355	M	2012	9	2	42	110	n.a.
5356	F	2012	9	12	79.5	142	n.a.
5357	F	2012	9	2	39.4	104	n.a.
5358	M	2012	9	2	40	104	n.a.
5359	F	2012	9	6	61	125	n.a.
5361	M	2012	9	0	22	90	n.a.
5362	F	2012	9	7	81	135	n.a.
5265	M	2011	5	5	126	160	n.a.
5266	F	2011	7	15	89	141	n.a.
5267	F	2011	7	1	28	93	n.a.
5268	F	2011	7	1	24	86	n.a.
5269	F	2011	7	1	25.2	95	n.a.
5272	M	2011	7	2	64	124.5	n.a.
5270	F	2011	8	1	21	97	n.a.
5271	M	2011	8	18	263	181	n.a.
5273	M	2011	8	9	205	173	n.a.
5274	M	2011	8	15	199	170	n.a.
5276	F	2011	10	11	141	153	n.a.
5277	M	2011	10	12	284	178	n.a.
330	M	2010	6	2	60	124	n.a.
341	F	2010	7	2	42	109	n.a.
338	M	2010	7	6	200	169	n.a.
772	F	2010	7	7	95	144	n.a.
343	F	2010	7	0	15	73	n.a.
342	M	2010	7	0	14	72	n.a.
786	F	2010	7	4	81	130	n.a.
5264	M	2010	9	3	128	153	n.a.
318	M	2009	6	2	61	117	n.a.
320	F	2009	6	1	33.2	98	n.a.
319	F	2009	6	18	119	143	n.a.
322	M	2009	7	15	165	187	n.a.
323	M	2009	7	1	38	100	n.a.
324	M	2009	7	1	37	101	n.a.
325	F	2009	7	9	94	140	n.a.
326	M	2009	8	range.AD	239	180	n.a.
327	M	2009	8	14	218	178	n.a.
328	F	2009	8	1	30	104	n.a.
4313	M	2008	6	2	45	110	n.a.
4315	F	2008	6	2	38	105	n.a.
4316	M	2008	6	3	104	144.5	n.a.
4317	M	2008	6	3	84	130.5	n.a.
4318	M	2008	6	2	69	121	n.a.
4319	M	2008	6	3	75	137	n.a.
4345	F	2008	7	4	71	121	n.a.
4344	F	2008	7	7	97	140	n.a.
4320	M	2008	7	1	21	84.5	n.a.
4346	M	2008	7	4	113	142	n.a.
4347	M	2008	8	13	186	167	n.a.
4348	F	2008	8	4	105	144	n.a.
4350	F	2008	11	4	150	148	n.a.
4304	F	2007	6	3	66	127	n.a.
4305	F	2007	6	8	107	147	n.a.
4306	M	2007	6	1	46	105	n.a.
4307	F	2007	6	1	36	98.5	n.a.
4308	F	2007	7	3	100	141	n.a.
4309	F	2007	7	range.SA	48	110.5	n.a.
4310	F	2007	7	5	88	134	n.a.
4311	M	2007	8	3	92.5	131	n.a.
4312	M	2007	8	2	58	114	n.a.
3388	M	2006	5	4	81	141.5	n.a.
3389	M	2006	6	2	50	94	n.a.
3390	M	2006	6	3	73	130	n.a.
3391	M	2006	7	3	83	128.5	n.a.
3392	F	2006	8	3	97.5	141	n.a.
3393	M	2006	8	12	283	186	n.a.
3394	M	2006	9	11	256	176.5	n.a.
4301	M	2006	10	2	110	146.5	n.a.
4302	M	2006	10	2	98	122	n.a.
3131	M	2005	5	2	52	112	n.a.
3132	M	2005	5	3	137	161	n.a.
3133	F	2005	5	2	49	116	n.a.
3134	F	2005	5	2	44	120	n.a.
3136	F	2005	5	2	66.5	127	n.a.
3135	M	2005	5	4	117	154.5	n.a.
3137	M	2005	5	2	81	134	n.a.
3138	M	2005	5	2	66	127	n.a.
3139	F	2005	6	5	95	135	n.a.
3381	M	2005	6	4	149	152	n.a.
3383	M	2005	8	0	10.2	69	n.a.
3384	F	2005	10	4	119.2	153	n.a.
3385	M	2005	11	13	290	194	n.a.
2767	M	2004	5	4	93.5	155	n.a.
2768	M	2004	5	3	88	134	n.a.
2769	M	2004	5	3	53	121	n.a.
2773	M	2004	9	1	65	112	n.a.
3130	M	2004	11	1	67	113	n.a.
2771	M	2003	6	3	134	155	n.a.
2772	M	2003	7	2	90	131	n.a.
2765	M	2003	9	2	90	133.5	n.a.
2766	M	2003	11	5	126	147	n.a.
4232	M	2002	5	2	62.5	119	n.a.
4245	M	2002	5	3	86.4	122.5	n.a.
4242	F	2002	5	14	112.5	148.5	n.a.
2756	F	2002	5	2	48	115	n.a.
2755	M	2002	5	2	56	117	n.a.
2758	M	2002	7	3	81	139	n.a.
2757	M	2002	7	18	241	176	n.a.
2760	M	2002	8	5	111	153	n.a.
2761	M	2002	8	15	209	189	n.a.
4249	F	2001	4	3	82	132	n.a.
4237	F	2001	5	3	59	122.5	n.a.
4244	M	2001	6	13	203	175.5	n.a.
4248	M	2001	7	10	251	180	n.a.
4238	M	2000	5	4	92	140.5	n.a.
4233	M	2000	5	2	45	112.5	n.a.
4241	M	2000	7	2	88	137	n.a.
4246	M	2000	10	2	113	148	n.a.
4239	F	2000	10	6	120	145	n.a.
4243	M	2000	10	2	84	135	n.a.
4250	M	2000	11	2	136	148	n.a.
1215	M	1999	5	2	50	133	n.a.
1218	M	1999	5	12	224	179	n.a.
1283	F	1999	6	1	31	98	n.a.
1282	F	1999	6	8	101	141.5	n.a.
1284	F	1999	8	1	35	97	n.a.
1281	F	1999	8	1	32	101.5	n.a.
1217	F	1999	8	1	26	95	n.a.
1285	F	1999	8	3	38	112.5	n.a.
1286	M	1999	8	4	69.5	155	n.a.
1287	F	1999	9	4	90	135	n.a.
5043	F	1998	7	10	110	144	n.a.
1210	M	1998	8	2	55	122	n.a.
1211	F	1998	8	8	61	133	n.a.
1214	F	1998	8	1	40	97	n.a.
5041	F	1998	8	range.AD	85	137	n.a.
1213	F	1998	9	1	42	104	n.a.
1280	F	1998	9	2	80	122	n.a.
