# Supplementary material for: Development of a noninvasive photograph-based method for the evaluation of body condition in free-ranging brown bears
Source: PeerJ. 2020 Sep 18;8:e9982. doi: 10.7717/peerj.9982 (PMC7505064; doi:10.7717/peerj.9982)
Supplement: Data S2 [file peerj-08-9982-s007.xlsx]

## Sheet: Sheet1
Photo ID	Quality	NF angle	Method	Height 1	Length 1	Height 2	Length 2	Height 3	Length 3
170924HC_#0018	NB	9.809	HBL	1300	3100	1308	3068	1320	3072
170924HC_#0018	NB	9.809	EBL	1312	3111.92	1320	3124.93	1320	3132.14
170924HC_#0018	NB	9.809	PBL	1316	3252.26	1316	3228.18	1312	3236.36
170924HC_#0018	NB	9.809	HTL	1312	1744	1320	1736	1320	1752
170924HC_#0022	BS	6.145	HBL	969	2151	972	2145	969	2133
170924HC_#0022	BS	6.145	EBL	969	2171.38	969	2164.35	960	2166.67
170924HC_#0022	BS	6.145	PBL	957	2246.8	966	2258.22	960	2258.79
170924HC_#0022	BS	6.145	HTL	963	1182	966	1194	966	1200
170925HC_#0097	NF	14.8703	HBL	880	1912	884	1910	878	1912
170925HC_#0097	NF	14.8703	EBL	886	1975.5	886	1978.85	880	1976.3
170925HC_#0097	NF	14.8703	PBL	878	2103.82	880	2113.25	880	2107.35
170925HC_#0097	NF	14.8703	HTL	882	1172	878	1168	878	1172
170925HC_#0101	NF	17.059	HBL	858	1826	860	1834	860	1836
170925HC_#0101	NF	17.059	EBL	862	1919.94	862	1923.33	862	1924.5
170925HC_#0101	NF	17.059	PBL	860	2041.04	860	2046.98	862	2053.67
170925HC_#0101	NF	17.059	HTL	854	1106	870	1092	866	1100
170925HC_#0103	NF	18.5337	HBL	854	1848	852	1850	856	1850
170925HC_#0103	NF	18.5337	EBL	854	1954.3	858	1956.82	852	1953.02
170925HC_#0103	NF	18.5337	PBL	852	2131.43	848	2124.93	856	2124.22
170925HC_#0103	NF	18.5337	HTL	854	1166	850	1166	854	1172
170925HC_#0113	Good	12.7967	HBL	828	1918	826	1908	826	1912
170925HC_#0113	Good	12.7967	EBL	832	1963.33	830	1979.27	824	1972.34
170925HC_#0113	Good	12.7967	PBL	824	2099.2	830	2087.82	828	2078.41
170925HC_#0113	Good	12.7967	HTL	830	1180	834	1170	828	1180
170925HC_#0117	NB	11.5827	HBL	894	1954	898	1942	888	1936
170925HC_#0117	NB	11.5827	EBL	892	1980.4	888	1977.64	888	1978.85
170925HC_#0117	NB	11.5827	PBL	894	2061.47	892	2059.63	884	2065.3
170925HC_#0117	NB	11.5827	HTL	890	1174	888	1172	890	1178
170925HC_#0118	BS	9.20033	HBL	1185	2733	1200	2736	1194	2730
170925HC_#0118	BS	9.20033	EBL	1191	2773.8	1197	2769.8	1194	2768.35
170925HC_#0118	BS	9.20033	PBL	1188	2852.14	1185	2846.8	1194	2847.88
170925HC_#0118	BS	9.20033	HTL	1194	1554	1194	1563	1200	1551
170925HC_#0123	Good	7.989	HBL	1248	2876	1264	2876	1264	2904
170925HC_#0123	Good	7.989	EBL	1264	2937.14	1256	2959.96	1252	2974.95
170925HC_#0123	Good	7.989	PBL	1268	3025.63	1268	3032.3	1280	3034.41
170925HC_#0123	Good	7.989	HTL	1264	1664	1264	1680	1256	1680
170925HC_#0126	NB	10.237	HBL	1276	2940	1284	2956	1280	2960
170925HC_#0126	NB	10.237	EBL	1280	3012.79	1276	3014.23	1284	3008.85
170925HC_#0126	NB	10.237	PBL	1296	3082.02	1284	3064.95	1284	3084.6
170925HC_#0126	NB	10.237	HTL	1260	1724	1260	1728	1264	1720
170925HC_#0129	NF	13.725	HBL	1284	2948	1284	2956	1288	2952
170925HC_#0129	NF	13.725	EBL	1292	3041.82	1292	3032.31	1288	3027.52
170925HC_#0129	NF	13.725	PBL	1296	3191.14	1292	3143.98	1276	3177.49
170925HC_#0129	NF	13.725	HTL	1288	1804	1284	1796	1288	1760
170925HC_#0139	NB	12.1157	HBL	1308	3032	1316	3028	1308	3020
170925HC_#0139	NB	12.1157	EBL	1312	3088.74	1320	3087.9	1316	3085.67
170925HC_#0139	NB	12.1157	PBL	1312	3197.83	1324	3201.97	1312	3208.33
170925HC_#0139	NB	12.1157	HTL	1316	1768	1300	1792	1304	1780
170925HC_#0141	BS	11.0423	HBL	1316	2976	1320	3012	1328	2956
170925HC_#0141	BS	11.0423	EBL	1332	3013.14	1320	3028.07	1324	3022.62
170925HC_#0141	BS	11.0423	PBL	1336	3127.34	1328	3130.54	1328	3121.99
170925HC_#0141	BS	11.0423	HTL	1320	1676	1332	1684	1324	1676
170925HC_#0142	Good	6.208	HBL	1276	3120	1288	3124	1284	3104
170925HC_#0142	Good	6.208	EBL	1280	3131.4	1284	3134.06	1288	3129.66
170925HC_#0142	Good	6.208	PBL	1284	3178.34	1284	3176.95	1292	3180.74
170925HC_#0142	Good	6.208	HTL	1292	1812	1288	1840	1296	1816
170925HC_#3380	NB	9.28467	HBL	452	1032	457.333	1032	458.667	1028
170925HC_#3380	NB	9.28467	EBL	460	1042.29	460	1045.37	458.667	1042.74
170925HC_#3380	NB	9.28467	PBL	460	1074.78	458.667	1081.68	461.333	1078.44
170925HC_#3380	NB	9.28467	HTL	460	592	458.667	592	460	593.333
170925HC_#3386	Good	6.90533	HBL	1092	2634	1095	2637	1098	2628
170925HC_#3386	Good	6.90533	EBL	1095	2656.11	1098	2650.51	1092	2653.13
170925HC_#3386	Good	6.90533	PBL	1092	2700.58	1095	2707.28	1092	2704.12
170925HC_#3386	Good	6.90533	HTL	1092	1524	1089	1515	1098	1524
170925HC_#3391	NB	10.511	HBL	1113	2529	1104	2520	1107	2514
170925HC_#3391	NB	10.511	EBL	1113	2563.64	1110	2557.19	1110	2559.05
170925HC_#3391	NB	10.511	PBL	1110	2654.45	1113	2646.46	1107	2642.42
170925HC_#3391	NB	10.511	HTL	1113	1461	1119	1449	1110	1458
170925HC_#3395	Good	8.527	HBL	1032	2397	1032	2403	1017	2400
170925HC_#3395	Good	8.527	EBL	1020	2437.55	1017	2436.45	1020	2439.41
170925HC_#3395	Good	8.527	PBL	1029	2500.06	1032	2494.18	1026	2485.28
170925HC_#3395	Good	8.527	HTL	1023	1389	1023	1395	1026	1383
170925HC_#3397	Good	10.21	HBL	1026	2442	1023	2442	1023	2439
170925HC_#3397	Good	10.21	EBL	1026	2479.08	1035	2485.82	1029	2482.03
170925HC_#3397	Good	10.21	PBL	1023	2542.18	1023	2545.95	1023	2554.28
170925HC_#3397	Good	10.21	HTL	1026	1425	1023	1422	1026	1422
170925HC_#3401	NF	14.521	HBL	1029	2304	1038	2307	1032	2307
170925HC_#3401	NF	14.521	EBL	1032	2384.4	1041	2382.99	1032	2375.8
170925HC_#3401	NF	14.521	PBL	1035	2509.14	1038	2503.43	1029	2501.39
170925HC_#3401	NF	14.521	HTL	1035	1458	1035	1464	1035	1467
170925HC_#3404	NF	13.917	HBL	1044	2376	1038	2370	1047	2370
170925HC_#3404	NF	13.917	EBL	1044	2444.76	1035	2444.05	1038	2453.5
170925HC_#3404	NF	13.917	PBL	1041	2585.7	1044	2581.89	1044	2586.65
170925HC_#3404	NF	13.917	HTL	1044	1452	1038	1461	1044	1452
170925HC_#3410	NF	16.283	HBL	1038	2355	1047	2352	1044	2361
170925HC_#3410	NF	16.283	EBL	1044	2452.8	1044	2449.11	1044	2444.12
170925HC_#3410	NF	16.283	PBL	1053	2595.21	1044	2610.37	1050	2618.38
170925HC_#3410	NF	16.283	HTL	1044	1461	1044	1461	1053	1455
170925HC_#3417	BS	10.8163	HBL	1056	2367	1056	2367	1065	2358
170925HC_#3417	BS	10.8163	EBL	1059	2435.23	1053	2438.32	1053	2432.28
170925HC_#3417	BS	10.8163	PBL	1062	2544.9	1062	2547.57	1056	2548.69
170925HC_#3417	BS	10.8163	HTL	1056	1413	1056	1419	1059	1425
170925HC_#3418	NB	10.3743	HBL	1032	2475	1041	2478	1041	2481
170925HC_#3418	NB	10.3743	EBL	1038	2522.02	1041	2519.61	1041	2522.02
170925HC_#3418	NB	10.3743	PBL	1038	2619.36	1038	2632.03	1038	2629.28
170925HC_#3418	NB	10.3743	HTL	1044	1476	1041	1467	1044	1473
170926HC_#0010	BS	12.3303	HBL	1652	3580	1656	3576	1652	3580
170926HC_#0010	BS	12.3303	EBL	1640	3670.47	1668	3670.96	1660	3672.66
170926HC_#0010	BS	12.3303	PBL	1648	3857.85	1640	3870.4	1652	3880.64
170926HC_#0010	BS	12.3303	HTL	1660	2192	1660	2192	1652	2184
170926HC_#0019	NB	9.684	HBL	1576	3512	1580	3508	1580	3524
170926HC_#0019	NB	9.684	EBL	1584	3567.5	1580	3566.83	1572	3566.16
170926HC_#0019	NB	9.684	PBL	1572	3834.9	1576	3823.16	1572	3839.81
170926HC_#0019	NB	9.684	HTL	1588	2256	1580	2240	1580	2232
170926HC_#0022	BS	9.18967	HBL	1584	3488	1592	3488	1592	3492
170926HC_#0022	BS	9.18967	EBL	1584	3520.43	1596	3513.55	1600	3539.31
170926HC_#0022	BS	9.18967	PBL	1596	3690.04	1588	3699.62	1592	3707.18
170926HC_#0022	BS	9.18967	HTL	1592	1964	1604	1956	1600	1968
170926HC_#0039	NF	17.5597	HBL	1938	4464	1944	4470	1932	4464
170926HC_#0039	NF	17.5597	EBL	1944	4685.02	1938	4683.2	1914	4672.06
170926HC_#0039	NF	17.5597	PBL	1932	5067.66	1932	5053.36	1926	5061.6
170926HC_#0039	NF	17.5597	HTL	1938	2802	1956	2796	1944	2802
170926HC_#0042	Good	7.494	HBL	1496	3532	1496	3536	1496	3524
170926HC_#0042	Good	7.494	EBL	1496	3587.22	1500	3575.22	1500	3568.08
170926HC_#0042	Good	7.494	PBL	1500	3690.66	1492	3710.25	1492	3707.56
170926HC_#0042	Good	7.494	HTL	1500	1960	1500	1956	1488	1964
170926HC_#0043	BS	10.7593	HBL	1472	2040	1476	3528	1476	3528
170926HC_#0043	BS	10.7593	EBL	1484	3596.11	1488	3593.14	1480	3588.25
170926HC_#0043	BS	10.7593	PBL	1488	3750.99	1484	3751.88	1476	3753.45
170926HC_#0043	BS	10.7593	HTL	1488	2024	1488	2028	1480	2016
170926HC_#0048	NB	12.4447	HBL	1508	3656	1504	3648	1508	3632
170926HC_#0048	NB	12.4447	EBL	1504	3734.25	1504	3735.55	1516	3741.65
170926HC_#0048	NB	12.4447	PBL	1508	3942.17	1500	3878.79	1520	3885.3
170926HC_#0048	NB	12.4447	HTL	1512	2180	1516	2184	1508	2184
170926HC_#0051	Good	8.792	HBL	1508	3764	1508	3752	1516	3804
170926HC_#0051	Good	8.792	EBL	1516	3790.51	1512	3791.02	1500	3813.93
170926HC_#0051	Good	8.792	PBL	1528	3928.76	1520	3920.8	1532	3921.59
170926HC_#0051	Good	8.792	HTL	1512	2260	1520	2252	1520	2248
170926HC_#0053	Good	12.696	HBL	1540	3816	1556	3824	1556	3820
170926HC_#0053	Good	12.696	EBL	1540	3884.76	1556	3895.7	1540	3881.54
170926HC_#0053	Good	12.696	PBL	1548	4024	1536	4012.5	1544	4019.01
170926HC_#0053	Good	12.696	HTL	1544	2248	1552	2248	1540	2248
170926HC_#0055	NB	10.481	HBL	1536	3788	1540	3796	1540	3784
170926HC_#0055	NB	10.481	EBL	1540	3845.73	1548	3857.84	1540	3841.07
170926HC_#0055	NB	10.481	PBL	1544	4037.74	1540	4017.22	1548	4040.48
170926HC_#0055	NB	10.481	HTL	1540	2252	1540	2244	1544	2260
170926HC_#0097	Good	9.218	HBL	512	1292	520	1298	518	1294
170926HC_#0097	Good	9.218	EBL	516	1309.28	520	1310.93	514	1312.59
170926HC_#0097	Good	9.218	PBL	516	1354.33	516	1356.73	510	1354.92
170926HC_#0097	Good	9.218	HTL	514	758	514	754	508	758
170926HC_#3526	NF	16.84	HBL	1480	3460	1468	3484	1472	3472
170926HC_#3526	NF	16.84	EBL	1468	3642.04	1480	3629.04	1480	3636.69
170926HC_#3526	NF	16.84	PBL	1472	3867.84	1476	3886	1480	3889.28
170926HC_#3526	NF	16.84	HTL	1484	2164	1480	2156	1480	2160
170926HC_#3529	Good	12.237	HBL	1456	3500	1456	3504	1452	3496
170926HC_#3529	Good	12.237	EBL	1452	3572.9	1456	3575.96	1452	3570.69
170926HC_#3529	Good	12.237	PBL	1452	3732.76	1452	3739.68	1452	3734.48
170926HC_#3529	Good	12.237	HTL	1460	2072	1456	2084	1460	2072
170926HC_#3536	Good	12.6597	HBL	951	2268	948	2268	951	2274
170926HC_#3536	Good	12.6597	EBL	954	2333.42	960	2327.56	951	2334.07
170926HC_#3536	Good	12.6597	PBL	954	2431.18	957	2432.49	948	2442.2
170926HC_#3536	Good	12.6597	HTL	954	1338	954	1329	960	1329
170926HC_#3538	BS	9.45833	HBL	942	1251	939	2304	939	2292
170926HC_#3538	BS	9.45833	EBL	936	2330.36	939	2335.29	942	2326.41
170926HC_#3538	BS	9.45833	PBL	942	2400.23	933	2408.07	945	2399.34
170926HC_#3538	BS	9.45833	HTL	942	1296	930	1290	930	1305
170926HC_#3541	NF	13.952	HBL	948	2247	951	2241	954	2250
170926HC_#3541	NF	13.952	EBL	957	2312.34	957	2314.53	960	2315.97
170926HC_#3541	NF	13.952	PBL	951	2457.74	963	2449.18	954	2450.34
170926HC_#3541	NF	13.952	HTL	954	1368	957	1368	957	1368
170926HC_#3543	BS	11.7003	HBL	1014	2421	1023	2421	1020	2427
170926HC_#3543	BS	11.7003	EBL	1014	2485.88	1017	2468.75	1014	2471.69
170926HC_#3543	BS	11.7003	PBL	1017	2579.85	1014	2582.81	1014	2575.5
170926HC_#3543	BS	11.7003	HTL	1017	1413	1017	1410	1011	1404
170926HC_#3546	Good	11.406	HBL	1038	2520	1044	2520	1038	2526
170926HC_#3546	Good	11.406	EBL	1044	2578.16	1038	2575.22	1041	2584.64
170926HC_#3546	Good	11.406	PBL	1044	2686.3	1047	2683.71	1047	2680.65
170926HC_#3546	Good	11.406	HTL	1047	1482	1044	1485	1041	1494
170926HC_#3549	Good	12.1993	HBL	1122	2730	1131	2727	1128	2736
170926HC_#3549	Good	12.1993	EBL	1134	2795.54	1131	2793.24	1125	2787.38
170926HC_#3549	Good	12.1993	PBL	1122	2908.8	1122	2904.3	1122	2908.34
170926HC_#3549	Good	12.1993	HTL	1128	1620	1125	1602	1125	1596
170926HC_#3553	Good	12.6253	HBL	1116	2685	1122	2697	1122	2709
170926HC_#3553	Good	12.6253	EBL	1119	2762.64	1122	2766.52	1119	2774.65
170926HC_#3553	Good	12.6253	PBL	1128	2922.18	1113	2920.68	1125	2927
170926HC_#3553	Good	12.6253	HTL	1128	1626	1137	1632	1134	1629
170926HC_#3573	Good	12.4133	HBL	1128	2745	1131	2748	1131	2742
170926HC_#3573	Good	12.4133	EBL	1125	2806.24	1131	2799.38	1128	2795.8
170926HC_#3573	Good	12.4133	PBL	1131	2937.16	1134	2954.26	1128	2936.19
170926HC_#3573	Good	12.4133	HTL	1131	1584	1134	1590	1134	1584
