# Supplementary material for: Development of a noninvasive photograph-based method for the evaluation of body condition in free-ranging brown bears
Source: PeerJ journal article supplement (doi:10.7717/peerj.9982), 2020-09-18
Supplement: Supplemental_Table_S1.pdf [file Supplemental_Table_S1.pdf]

Supplemental Information

*PeerJ*

## **Development of a noninvasive photograph-based method for the evaluation of body condition in free-ranging brown bears**

Yuri Shirane<sup>1</sup>, Fumihiko Mori<sup>1</sup>, Masami Yamanaka<sup>2</sup>, Masanao Nakanishi<sup>2</sup>, Tsuyoshi Ishinazaka<sup>2</sup>, Tsutomu Mano<sup>3</sup>, Mina Jimbo<sup>1</sup>, Mariko Sashika<sup>1</sup>, Toshio Tsubota<sup>1</sup>, and Michito Shimozuru<sup>1</sup>

<sup>1</sup> Laboratory of Wildlife Biology and Medicine, Graduate School of Veterinary Medicine, Hokkaido University, Sapporo, Hokkaido, Japan

<sup>2</sup> Shiretoko Nature Foundation, Shari, Hokkaido, Japan

<sup>3</sup> Hokkaido Research Organization, Sapporo, Hokkaido, Japan

Corresponding Author:

Michito Shimozuru

Kita 18 Nishi 9, Kita-ku, Sapporo, Hokkaido, 060-0818, Japan

Email address: [shimozuru@vetmed.hokudai.ac.jp](mailto:shimozuru@vetmed.hokudai.ac.jp)

**Table S1:****Definition of grades (scores) used for each photograph attribute to select photographs for assessing body condition.**

See Fig. S1 for example pictures of each grade for each attribute of bear posture.

| Attribute                           | Score 1 (good)                                                                                                                        | Score 2 (medium)                                                                                                                     | Score 3 (poor)                                                                                                              |
|-------------------------------------|---------------------------------------------------------------------------------------------------------------------------------------|--------------------------------------------------------------------------------------------------------------------------------------|-----------------------------------------------------------------------------------------------------------------------------|
| <b>Photographing condition</b>      |                                                                                                                                       |                                                                                                                                      |                                                                                                                             |
| (A) Camera focus                    | The picture is sharp with the contour of the bear's body clearly visible.                                                             | The picture is blurry, but still clear enough to make out the contour of the bear's body.                                            | The picture is too blurry to make out the contour of the bear's body.                                                       |
| (B) Camera tilt                     | The dorsal and ventral surface of the bear are vertical to the camera.                                                                | The dorsal and ventral surface of the bear deviate slightly from the vertical with the camera.                                       | The dorsal and ventral surface of the bear deviates significantly from the vertical with the camera.                        |
| (C) Body angle                      | The body axis of the bear is perpendicular to the camera.                                                                             | The body axis of the bear is angled slightly in the parallel plane, either back or forth.                                            | The body axis of the bear is angled significantly in the parallel plane, either back or forth.                              |
| (D) Torso height measurability      | Both the highest part of the waist and the lowest part of the abdomen are clearly visible.                                            | The highest part of the waist or the lowest part of the abdomen is unclear or partly obscured, but can still be approximated.        | The highest part of the waist and/or the lowest part of the abdomen are not visible due to another animal or object.        |
| (E) Body/torso length measurability | The tip of nose (for HBL, EBL and PBL), the highest part of the shoulder (for PBL and HTL), and the base of tail are clearly visible. | The tip of nose, the highest part of the shoulder, or the base of tail is unclear or partly obscured, but can still be approximated. | The tip of nose, the highest part of the shoulder, and/or the base of tail are not visible due to another animal or object. |
| <b>Bear posture</b>                 |                                                                                                                                       |                                                                                                                                      |                                                                                                                             |
| (A) Body arch                       | No visible arching of the body. The bear stands parallel to the ground.                                                               | -                                                                                                                                    | The legs or the central part of the body is significantly lifted or dropped.                                                |
| (B) Body straightness               | Right/left forelimb and hindlimb are in front of the other. The hip joint is not fully extended.                                      | Right/left forelimb and hindlimb are inside the body or either of the legs is fully extended.                                        | -                                                                                                                           |
| (C) Neck flexion                    | The angle between the ground surface and the line connecting the base of tail and the tip of nose is < 13 degree.                     | The angle between the ground surface and the line connecting the base of tail and the tip of nose is $\geq$ 13 degree.               | -                                                                                                                           |
| (D) Neck lateral bending            | The neck of the bear is not bending laterally. The left and right ears are aligned.                                                   | The neck of the bear is bending to the side. The left and right ears do not overlap.                                                 | -                                                                                                                           |
